# Supplementary material for: Circadian and Light Regulated Expression of CBFs and their Upstream Signalling Genes in Barley
Source: MDPI journal article supplement (doi:10.3390/ijms18081828), 2017-08-22
Supplement: s1 [file s1]

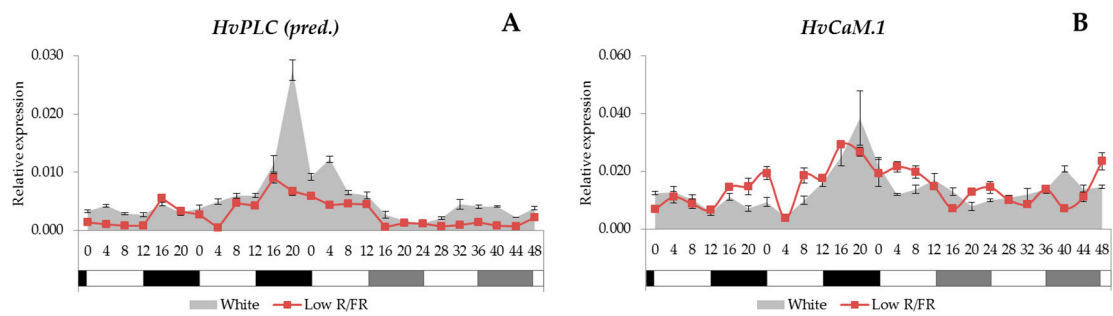

**Supplemental Figure S1.** Expression patterns of *HvPLC (pred.)* and *HvCaM1* (panels A, B, respectively) with white light and low R/FR illumination. Conditions are the same as in Figure 1.

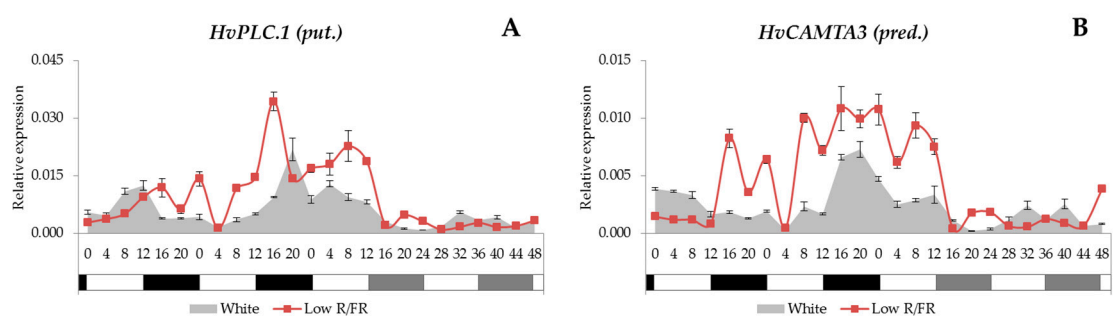

**Supplemental Figure S2.** Gene expression patterns of the *HvPLC.1 (put.)* and *HvCAMTA3 (pred.)* (panels A, B, respectively) with white light and with supplemental FR in the spectra. Conditions are the same as in Figure 1.

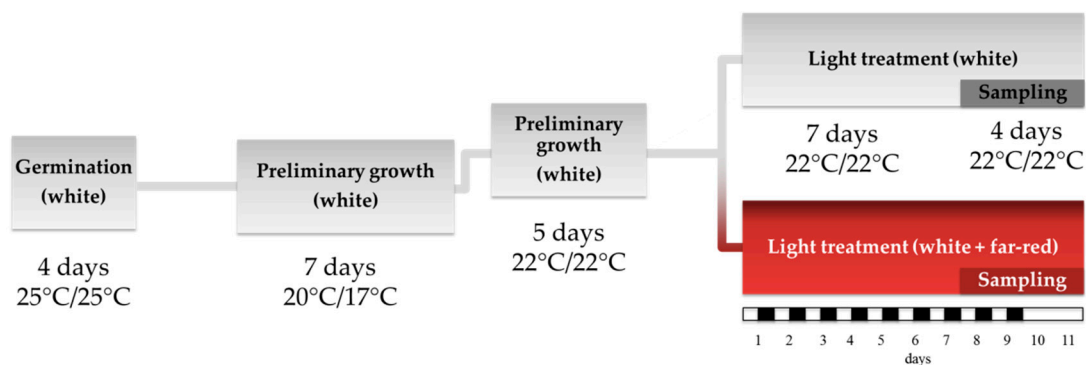

**Supplemental Figure S3.** Graphical representation of growth conditions and sample collection during the whole experiment. Details are in the manuscript.
