# Supplementary material for: Circadian and Light Regulated Expression of CBFs and their Upstream Signalling Genes in Barley
Source: Int J Mol Sci. 2017 Aug 22;18(8):1828. doi: 10.3390/ijms18081828 (PMC5578212; doi:10.3390/ijms18081828)
Supplement: Supplementary file 1 [file ijms-18-01828-s001.zip › Supplemental Table S1 (Round 3).xlsx]

## Sheet: Munka1
Supplemental Table S1
Primer sequences and their origin used in Real-Time PCR
Primer sequences for the target genes
Target gene	Gene ID (NCBI)		Primer sequences (5' → 3')				Originated from
HvCyclophilin	AK253120.1	Forward	CCTGTCGTGTCGTCGGTCTAAA				A: [70]
		Reverse	ACGCAGATCCAGCAGCCTAAAG
HvCCA1	JN603242.1	Forward	AATAAGACTGGGGCAACTGGC				B
		Reverse	TAGTTGTGGGGAAAGGGCTG
HvTOC1	HQ850268.1	Forward	AGGCAGAAAAGGAAGGACCG				B
		Reverse	TGCCTAACAAACTGACCCCG
HvPITP	AK374523.1	Forward	AGTGGTACGGCATGACCATGGAG				C
		Reverse	CTACGTGCAGCTCCCCATGACTG
HvPI4K	AK360859.1	Forward	CTATTGCTAATCTTCGGAAGCGGTTTC				C
		Reverse	CTATTTCTCAATACCTTGCTGCAAGTATTGAATC
HvPLC (pred.)	AK360343.1	Forward	TCTCCAAGCCAAAGTAGCCG				C
		Reverse	CCCTGAATTCTTGTGGTGGTTTAG
HvPLC.1 (put.)	AK370341.1	Forward	GCCACAACTCCTACCTCACCG				C
		Reverse	TAGGGAGATGCGACGAAAGC
HvPLD (put.)	AJ495780.1	Forward	AAAGGGCATGATTGTGGACG				B
		Reverse	TCCACGAGGGGCAGAAATC
HvCBL2	HQ696014.1	Forward	AGACGAGCAAGAAGGAGAGCC				B
		Reverse	CACGAGCAAACTCTTCAAACCC
HvCaM.1	GQ926857.1	Forward	CGGTGTCCTTCATCTTGCG				B
		Reverse	ACGAGGTTGATGCTGACGG
HvCaM.2	M27303.1	Forward	CAACGGCACCATTGACTTCC				B
		Reverse	GCAGAGATGAAGCCGTTTTGG
HvCDPK12	EU240660.2	Forward	TTTGCTATGTGGTGTCCCCC				B
		Reverse	GCAGAGAGCCGCTTTGTAGG
HvCAMTA3 (pred.)	AK365210.1	Forward	ATCTCGAAGTCAAGGCTGGC				C
		Reverse	TCGTATTCAGAGGCTTGTCCG
HvCBF1	AY785839.1	Forward	ATGGACGATGGTATGGACTTC				A: [71]*
		Reverse	TGCACATGCATTAGTAGTTC
HvCBF2A	AY785841.1	Forward	CCGCAGTTTGAGGAGCAAG				B
		Reverse	CGTCGGCTGGGTGCTG
HvCBF3	EU331981.1	Forward	TGTTCAGGCTTGACTTGTTCC				A: [71]*
		Reverse	AAACAGAGCAGAATCATCTGG
HvCBF4B	AY785850.1	Forward	GATTATTCTTCCAGTAGCGTGTCCATC				B
		Reverse	GCAGTCGAACAAATAGCTCCATAGTG
HvCBF6	EU332012.1	Forward	TGGGATGGGACCTTTACTACG				A: [71]*
		Reverse	GCATCAATCGGAAGCCAAGAC
HvCBF9	AY785877.1	Forward	AGCACTACTGTCAACATGTAG				A: [71]*
		Reverse	CCTTGATTTCGATTCATGGAG
HvCBF10A	AY785881.1	Forward	ATGGACATCGAAATGTTCAGG				A: [71]*
		Reverse	AGTCAAAACAAAGCAGAGTCC
HvCBF11	AY785889.1	Forward	TGCAGGGCTATCTTGACATGG				A: [71]*
		Reverse	ACAGGTTTGTCCTGGATGACC
HvCBF12	EU593539.1	Forward	CTTTGCTTAACGCTTCAAACC				A: [72]
		Reverse	ACAGCTTGTGGTGTGTGACG
HvCBF14	DQ151545.1	Forward	GTTGAATGAGCACTGGTTTGG				A: [71]*
		Reverse	ACAATGAACGAGCAGGTATGG
HvCBF15	EU593535.1	Forward	GGACCTGGACACATACTATGC				A: [71]*
		Reverse	TGCTGGAAGGGAACAGCTTCG
HvCBF16	EU593542.1	Forward	ATGGACCTGGGCACGTACTAC				A: [71]*
		Reverse	TGCATAGAATCAAAGCAGCTG
A: The primer sequence was taken from the literature.
B: Retrieving by gene name and species from NCBI.
C: Searched through NCBI BLAST alignment.
* kindly provided by Morran et al., 2011. Plant Biotechnology Journal 9: 230-249.
Nucleotide BLAST
Target gene	Query sequence	Database	Organism	Max score	Total Score	Query cover	E value	Ident
HvPITP	XM_020294916.1	nucleotide collection (nr)	Hordeum (taxid:4512)	1618	1618	0.83	0.0	0.94
HvPI4K	AJ429217.1	nucleotide collection (nr)	Hordeum (taxid:4512)	2364	2364	0.89	0.0	0.88
HvPLC (pred.)	XM_003579013.3	nucleotide collection (nr)	monocots (taxid:4447)	2220	2220	0.74	0.0	0.89
HvPLC.1 (put.)	HM754654.1	nucleotide collection (nr)	Hordeum (taxid:4512)	2440	2440	0.9	0.0	0.92
HvCAMTA3 (pred.)	XM_010230752.2	nucleotide collection (nr)	monocots (taxid:4447)	2608	3475	0.92	0.0	0.88
