# Supplementary material for: Circadian and Light Regulated Expression of CBFs and their Upstream Signalling Genes in Barley
Source: Int J Mol Sci. 2017 Aug 22;18(8):1828. doi: 10.3390/ijms18081828 (PMC5578212; doi:10.3390/ijms18081828)
Supplement: Supplementary file 1 [file ijms-18-01828-s001.zip › Supplemental Table S2 (Round 3).xlsx]

## Sheet: Munka1
Supplemental Table S2
Mean ΔCt values and the standard deviation data of the three technical replicates.
The values above the white, black and grey bars show the time in hours after dawn.
The white and black bars symbolise the light and dark periods, while grey bars indicate subjective night.
hours after dawn		0	4	8	12	16	20	0	4	8	12	16	20	0	4	8	12	16	20	24	28	32	36	40	44	48
light and dark periods
Gene name	Treatment	Mean ΔCt values of the three technical replicates
HvCCA1	White	0.456699	0.151121	0.0163308	0.000885719	0.00028652	0.00222192	0.326573	0.0449843	0.0275783	0.00474247	0.00275619	0.0441043	0.726989	0.13141	0.00304852	0.0250453	0.00280332	0.0143994	0.0378291	0.0651982	0.028227	0.00420393	0.00518359	0.0116818	0.10319
	Low R/FR	0.182392	0.0912095	0.00934649	0.000551251	0.00268374	0.00151533	0.382834	0.0377888	0.0403848	0.00388344	0.00486535	0.0244841	1.16223	0.329421	0.0288444	0.00424132	0.00105786	0.00705836	0.0071402	0.00817566	0.00220585	0.00417025	0.00451792	0.0102138	0.0218532
HvTOC1	White	0.0023768	0.000201552	0.00814703	0.0152084	0.0147436	0.00889247	0.00327892	0.000932197	0.0107608	0.0389525	0.0389607	0.0333267	0.00224512	0.000321011	0.0333051	0.0263611	0.0217104	0.0127993	0.00494345	0.00190187	0.00643466	0.0372661	0.0214672	0.0169562	0.0097173
	Low R/FR	0.0062256	0.000421747	0.016226	0.0368342	0.0563165	0.0244862	0.0110387	0.000344899	0.0259305	0.0814833	0.115652	0.0380072	0.00841125	0.00213284	0.0449647	0.099995	0.0197937	0.0209788	0.0281421	0.0241534	0.0385982	0.0266952	0.0193143	0.027185	0.0294936
HvPITP	White	0.026024	0.0298727	0.00868753	0.00414673	0.00192487	0.00449669	0.0281219	0.0205652	0.00797782	0.00745288	0.00958125	0.0124009	0.0503015	0.00767972	0.00830741	0.00840147	0.0116628	0.0431631	0.0406656	0.025484	0.00220014	0.0102541	0.0209375	0.0471947	0.0218396
	Low R/FR	0.0209178	0.00579147	0.00246878	0.0054419	0.000911371	0.00183349	0.0102614	0.00545217	0.00427093	0.00886862	0.00240868	0.00418184	0.0245661	0.0155984	0.00497142	0.0049155	0.00559396	0.00896204	0.00801168	0.011088	0.00676965	0.00956323	0.010998	0.0142075	0.00856635
HvPI4K	White	0.00692598	0.0066314	0.00474579	0.00341957	0.00439881	0.00775334	0.0100016	0.010425	0.00587968	0.0051701	0.0140432	0.0228029	0.00992022	0.00390797	0.00552607	0.00716792	0.0108123	0.0129968	0.00897984	0.0118073	0.00335954	0.00745415	0.00826397	0.0121358	0.00711509
	Low R/FR	0.00941607	0.00575844	0.00457585	0.00567607	0.0149546	0.0108128	0.0135278	0.00453459	0.00584963	0.0081351	0.0234855	0.0116828	0.0144509	0.0115046	0.00775925	0.00742053	0.00475693	0.00486296	0.00670986	0.00825227	0.00799262	0.00960748	0.00596532	0.00742484	0.00752392
HvPLC (pred.)	White	0.00331023	0.00429359	0.00290392	0.00271199	0.00455782	0.0030745	0.00383183	0.00497642	0.00601583	0.00599067	0.0114702	0.0275585	0.00922756	0.0122658	0.00648452	0.00602591	0.00271648	0.00168265	0.00126937	0.00211258	0.00453339	0.0041245	0.00413005	0.00227484	0.00385999
	Low R/FR	0.00143829	0.00109855	0.000850233	0.000849517	0.00555447	0.00327838	0.00269535	0.000464872	0.00474615	0.00426574	0.00900968	0.00668559	0.00591585	0.00437994	0.00463431	0.00453895	0.000653988	0.00134799	0.00116969	0.000717757	0.000943746	0.00148209	0.000833341	0.000759015	0.00226712
HvPLC.1 (put.)	White	0.00552559	0.00466391	0.010963	0.0124986	0.0039038	0.0039611	0.00435414	0.00160966	0.00364634	0.00509449	0.00941745	0.0219053	0.00882666	0.0128737	0.00943365	0.00820113	0.00304931	0.00133026	0.000853983	0.00182383	0.0056002	0.00348664	0.00426225	0.00147364	0.00322944
	Low R/FR	0.00288906	0.00378528	0.00513188	0.00951805	0.0118938	0.00639616	0.0142344	0.00137014	0.0117245	0.0146067	0.0343564	0.01423	0.016968	0.0180347	0.0227404	0.0187164	0.00213798	0.00480236	0.00313654	0.00102325	0.00172033	0.00276486	0.00167539	0.00196202	0.00335944
HvPLD (put.)	White	0.0537916	0.0263066	0.0140179	0.00540099	0.00556246	0.0112618	0.0283019	0.00757265	0.0207692	0.026726	0.0464706	0.0998549	0.0694392	0.0564008	0.0169571	0.0345988	0.0203043	0.0129771	0.0156089	0.0146001	0.0257671	0.0202235	0.0245655	0.015257	0.0371466
	Low R/FR	0.0298529	0.0475882	0.0236656	0.0153273	0.0687442	0.0869708	0.155403	0.00939924	0.0482341	0.0533067	0.0918119	0.104006	0.169595	0.0649443	0.044102	0.0417417	0.0069454	0.00906978	0.0328324	0.0161679	0.0152438	0.0288053	0.0173544	0.018464	0.0393968
HvCBL2	White	0.0654596	0.036936	0.0173155	0.0146632	0.0200825	0.0161173	0.0513293	0.00803061	0.0170931	0.0241014	0.0239451	0.0375203	0.0467717	0.0518116	0.0210434	0.0245923	0.0153897	0.0139199	0.00831645	0.0178196	0.0130933	0.0179925	0.0258901	0.0201473	0.0323265
	Low R/FR	0.0440293	0.0238625	0.0214613	0.021787	0.0329525	0.0305954	0.0704657	0.0105914	0.0344982	0.059901	0.0715012	0.0677869	0.110128	0.072598	0.0583871	0.0488818	0.00995276	0.0291756	0.0141793	0.01195	0.0128965	0.0119068	0.0124547	0.0131481	0.025928
HvCaM.1	White	0.0124194	0.0127887	0.0102477	0.00590892	0.011208	0.00716809	0.00933052	0.00407661	0.00998943	0.016159	0.0250902	0.0384354	0.0219715	0.0119399	0.0137654	0.0170209	0.0129708	0.00793153	0.00997696	0.0109044	0.0120207	0.0138254	0.0208389	0.0138138	0.0145851
	Low R/FR	0.00685935	0.0110883	0.00870362	0.00668075	0.0145229	0.0148279	0.0194028	0.00374435	0.0185333	0.0176272	0.0292142	0.026775	0.0193971	0.021594	0.0198553	0.0146475	0.00707011	0.0127812	0.0144529	0.0101069	0.00859227	0.0137662	0.00722995	0.0111941	0.0234698
HvCaM.2	White	0.389871	0.424565	0.396018	0.380693	0.970344	0.443113	0.340466	0.242457	0.587513	0.619179	0.912019	1.03502	0.530808	0.602865	0.543254	0.51678	0.381635	0.265383	0.217095	0.314837	0.33149	0.533261	0.470922	0.388369	0.473763
	Low R/FR	0.373542	0.323989	0.344745	0.358535	1.32843	1.16058	0.906388	0.160394	0.613416	0.834988	1.20743	1.53511	0.905148	0.552176	0.740843	1.09852	0.27048	0.245523	0.283135	0.310057	0.210189	0.458376	0.305294	0.332409	0.390901
HvCDPK12	White	0.012647	0.00474404	0.00324359	0.00258186	0.0127374	0.00874781	0.0161894	0.00143672	0.00668231	0.00983846	0.00959193	0.0166366	0.0161828	0.0120883	0.00382988	0.00504631	0.00360592	0.00116197	0.000723581	0.00149905	0.0037208	0.00265222	0.00390617	0.00178972	0.00844136
	Low R/FR	0.0192139	0.00843815	0.0136561	0.00856278	0.0234347	0.0192201	0.038123	0.00394036	0.0234381	0.018976	0.0471002	0.0310106	0.037064	0.0259033	0.0186934	0.020958	0.00289368	0.00705092	0.00903329	0.00517736	0.0048006	0.00616334	0.0114903	0.00758051	0.0131543
HvCAMTA3 (pred.)	White	0.00386857	0.00365729	0.00332866	0.00166094	0.00186334	0.00129545	0.00192083	0.000284779	0.00234221	0.00168228	0.00660546	0.00729644	0.00471291	0.00251144	0.00289417	0.00336791	0.00113915	0.000221948	0.000380454	0.00120586	0.00245431	0.00119228	0.00255934	0.000660154	0.000810737
	Low R/FR	0.00146244	0.00119723	0.00119137	0.000843126	0.00825787	0.00358146	0.00642494	0.000485192	0.0100213	0.00720622	0.0108398	0.00993092	0.0107586	0.00617183	0.00937083	0.00752409	0.00039694	0.00175971	0.00184112	0.000654131	0.000572249	0.00125271	0.000879535	0.000633268	0.00384669
HvCBF2A	White	0.000169389	0.00355835	0.0151899	0.00552781	0.00468897	0.00130797	0.000268908	0.000445441	0.00935943	0.0197333	0.0085891	0.00171553	0.000436864	0.00582847	0.0113988	0.0332539	0.000775342	0.000137133	0.000164641	0.00326327	0.00572704	0.0112873	0.00171936	0.000375429	0.000259887
	Low R/FR	0.000189861	0.00125694	0.0124116	0.00595904	0.00806905	0.0023868	0.000249154	0.000332483	0.0340161	0.0219094	0.00893002	0.00217379	0.000414166	0.00599923	0.0555174	0.0177251	0.000650429	0.00251873	0.00107726	0.00374456	0.00259427	0.00290456	0.00222648	0.00163375	0.00316296
HvCBF3	White	4.60105e-05	8.53182e-06	1.59566e-05	1.65846e-05	1.40548e-05	3.01757e-05	0.000106874	1.48862e-05	1.91466e-05	7.88674e-06	9.2738e-05	0.000183542	8.12641e-05	6.68666e-06	1.91168e-05	3.0776e-05	3.75364e-05	7.39204e-06	6.87401e-06	1.31474e-05	3.17599e-05	3.34974e-05	1.88027e-05	1.84307e-05	1.63433e-05
	Low R/FR	1.44862e-05	2.99878e-05	1.05618e-05	5.74856e-06	8.15526e-05	5.12389e-05	0.000183706	1.07099e-05	1.7013e-05	6.46011e-05	0.000406165	0.000103603	8.19174e-05	1.87211e-05	3.76116e-05	4.84958e-05	2.11699e-05	1.04658e-05	1.43893e-05	1.48038e-05	9.59938e-05	2.35416e-05	1.53022e-05	9.14563e-06	1.9719e-05
HvCBF4B	White	1.48474e-05	0.000988335	0.0271956	0.00759041	0.00700643	0.00138809	8.4084e-06	0.000408199	0.0233065	0.0376067	0.00813327	0.000635192	9.7515e-06	0.00267394	0.0171554	0.0738344	0.000629563	0.000108344	5.11371e-05	0.0036295	0.0109297	0.0291081	0.00120016	0.000214078	7.04393e-05
	Low R/FR	2.21099e-05	0.000875632	0.0315704	0.00679641	0.0174776	0.00334209	1.00961e-05	0.000307733	0.0679613	0.01919	0.0156401	0.00112456	2.53537e-05	0.00481687	0.110213	0.0396131	0.00164432	0.00239063	0.00168598	0.00663111	0.0104289	0.00848218	0.00261367	0.0023921	0.00314182
HvCBF6	White	0.00163088	0.000719938	0.000306256	0.00308241	0.000817244	0.000286297	0.000308306	0.000173672	0.000900852	0.004473	0.000559472	0.000955072	0.000500474	0.000930532	0.000156092	0.00102155	0.0001306	0.000260273	0.000268485	0.000353411	0.000581043	0.000269088	0.000117774	0.000181081	0.00015505
	Low R/FR	0.000560176	0.000363581	0.000175513	0.00435098	0.000339703	0.00016413	0.000548954	0.000123189	0.000586786	0.0147789	0.000618557	0.00029402	0.000797203	0.000499678	0.000392811	0.000195351	2.98318e-05	0.000120561	9.09547e-05	8.34827e-05	0.000180527	9.93452e-05	0.000142522	8.98404e-05	9.73015e-05
HvCBF9	White	0.000579833	0.000712241	0.00332461	0.000282772	0.0010287	0.000131673	0.000229602	8.47926e-05	0.00232587	0.00248152	0.00110662	0.00139417	0.000826702	0.00124906	0.00155316	0.012781	0.000537965	0.00041197	0.000446167	0.00102795	0.000804925	0.00315856	0.000387274	0.00016348	0.00029621
	Low R/FR	0.00245107	0.00154971	0.00668627	0.00359656	0.0019316	0.000795572	0.0012285	0.000371595	0.00660727	0.00262055	0.00390255	0.00095464	0.00378321	0.00391127	0.0258202	0.0058846	0.00141054	0.00109098	0.00131232	0.00145667	0.00479061	0.00286439	0.000948153	0.00343699	0.00291351
HvCBF14	White	0.000127034	0.00325659	0.0321607	0.00244562	2.76553e-05	n/a	n/a	0.00032167	0.00854626	0.00739754	n/a	8.64029e-05	0.000112427	0.00428496	0.00377501	0.0249831	6.00073e-05	8.33946e-05	0.000193135	0.00154217	0.00970895	0.00595521	0.00104197	0.000257162	0.000943674
	Low R/FR	n/a	0.00163153	0.015412	0.00533702	2.99178e-05	n/a	n/a	0.000287489	0.012862	0.00613532	n/a	n/a	0.000370998	0.00716481	0.0456833	0.00478139	0.00103211	0.00191334	0.0021008	0.00108698	0.00193721	0.00302034	0.002884	0.0049544	0.00430847
hours after dawn		0	4	8	12	16	20	0	4	8	12	16	20	0	4	8	12	16	20	24	28	32	36	40	44	48
light and dark periods
Gene name	Treatment	Standard deviation data of the three technical replicates
HvCCA1	White	0.0352017	0.0116336	0.000559963	0.000194211	9.53412e-05	0.000292628	0.0307573	0.00301451	0.00150103	0.000835503	0.000428728	0.00349468	0.0491412	0.0103135	0.000258311	0.00308982	0.000296317	0.00132032	0.00154644	0.00547437	0.0034134	0.000149244	0.000595277	0.00107132	0.00577335
	Low R/FR	0.00758353	0.0117133	0.000661321	4.2195e-05	0.000604863	6.09439e-05	0.0338227	0.00303208	0.00574931	0.000348988	0.000719225	0.00139345	0.0764614	0.0241632	0.00303071	0.000513817	0.000126961	0.000649138	0.000667303	0.000521288	3.227e-05	0.000306918	0.000646062	0.00115813	0.00393211
HvTOC1	White	2.61869e-05	2.84469e-06	0.000298801	0.0012688	0.00115895	0.000517015	0.000246263	0.000198974	0.00160723	0.00478366	0.000620948	0.00342372	0.000215942	2.15001e-05	0.00118168	0.000185009	0.00296647	0.00155611	0.00018001	0.000242984	0.000193773	0.00381552	0.00147562	0.00188652	0.000482167
	Low R/FR	0.000447935	0.000101632	0.001808	0.00276475	0.00575395	0.0037008	0.000253432	3.71204e-06	0.000555898	0.0108567	0.00363065	0.00471105	0.000914027	0.000267988	0.00173777	0.0181011	0.000752371	0.00301134	0.000981016	0.00195072	0.00233088	0.00117086	0.00152873	0.00203076	0.00221692
HvPITP	White	0.00398766	0.00172448	0.00171162	0.000655782	0.000284092	0.000166521	0.0020802	0.00174472	0.000294481	0.00131682	0.00141123	0.00208735	0.0037215	0.000357143	0.000217806	0.000562613	0.00329396	0.0154422	0.00230511	0.00305414	0.000505777	0.000815836	0.00346804	0.0130877	0.00168802
	Low R/FR	0.00295108	0.00108357	6.32784e-05	0.000594458	7.32612e-05	0.000300095	0.000485818	0.000462539	0.000608605	0.000208327	0.000257739	0.000359794	0.00197977	0.00149324	6.53013e-05	0.000280609	0.000573622	0.000481087	0.000660501	0.000542949	0.000356953	0.000274298	0.000407993	0.000478788	0.00074661
HvPI4K	White	0.00198568	0.00056044	0.0010296	0.000430981	0.00100323	0.000460739	0.000636558	0.00135327	0.00161225	0.000658641	0.00172062	0.00353579	0.00200916	0.000161904	0.000694849	0.000315201	0.00195211	0.00161365	0.000851396	0.00220769	0.000104665	0.000134843	0.000354354	0.0014266	0.00110435
	Low R/FR	0.000605646	0.000235208	0.000577356	0.00115342	0.000916664	0.000425695	0.00110418	0.000374649	0.000486871	0.00106596	0.00180201	0.00285218	0.00103974	0.000244174	0.000408018	0.000372986	0.000449586	0.000247695	0.000230917	0.000524778	0.00059592	0.000100102	0.000349372	0.00027674	6.77512e-05
HvPLC (pred.)	White	0.000194515	0.000215208	0.000221505	0.00036468	0.000251926	0.000502183	0.000592062	0.000426077	0.000405184	0.000348198	0.00140138	0.00176708	0.000622047	0.000531634	0.000383846	0.00057963	0.000581769	0.000248811	0.000106223	0.000218771	0.000816416	0.000285304	0.000118678	2.17044e-05	0.000267582
	Low R/FR	0.000190197	0.000187602	7.70694e-05	0.000168205	0.00074126	0.00044663	0.000158203	0.000148897	0.000210634	0.00035329	0.000851917	0.000684237	0.000457351	0.000541317	0.000221974	0.000534274	0.000128226	0.000164151	0.000121238	0.000106492	6.73816e-05	0.00012828	0.000138637	0.00010974	0.00021205
HvPLC.1 (put.)	White	0.000458898	0.000777013	0.000841474	0.00127485	0.000192185	0.000205932	0.000702314	0.00023904	0.000523809	0.000243771	0.000190865	0.00300193	0.00101127	0.000789016	0.000912741	0.000526021	0.000130285	0.000189003	4.01791e-05	0.000113879	0.000359492	0.000262757	0.000455058	0.000219754	0.000187616
	Low R/FR	0.000315251	0.000288092	0.000207728	0.000555442	0.00235711	0.00112862	0.00185479	0.000105372	0.000910459	0.000542987	0.00240854	0.000781113	0.00106198	0.00290136	0.00402339	0.0007454	8.92408e-05	0.000203673	0.000228461	0.000124036	0.000140323	0.000294634	0.000218678	0.000290918	0.000186158
HvPLD (put.)	White	0.00380168	0.00415275	0.0021593	0.000231163	0.000522817	0.000322628	0.00113491	0.000747035	0.0019237	0.00186458	0.00354561	0.00290972	0.00569191	0.0071975	0.000421709	0.00207363	0.00131622	0.00116613	0.00163344	0.00130106	0.00386468	0.00251883	0.00238263	0.00192572	0.00150186
	Low R/FR	0.0050372	0.0074306	0.000939823	0.00201238	0.00647758	0.00959597	0.0245124	0.00108848	0.00286134	0.00325652	0.0113671	0.010532	0.00451766	0.0119757	0.00873945	0.00401974	0.00132043	0.000470115	0.00178235	0.00129441	0.00266471	0.00190599	0.00118756	0.00108698	0.000914097
HvCBL2	White	0.00348024	0.00252728	0.000672362	0.00115006	0.00053351	0.00101505	0.00303922	0.000429669	0.000755208	0.00130489	0.0019412	0.00140866	0.00388416	0.00650878	0.00157731	0.00257024	0.000915211	0.00020132	0.00084636	0.000171107	0.00150815	0.000884965	0.000257691	0.00190679	0.000936001
	Low R/FR	0.0052378	0.00186954	0.00159854	0.00142401	0.00258927	0.0036672	0.00705611	0.000999223	0.00152986	0.00312663	0.0026527	0.000964045	0.000783279	0.00947932	0.00642803	0.00412922	0.0015706	0.000634723	0.000899162	0.000150631	0.00112071	0.000552841	0.00068401	0.00126142	0.000891826
HvCaM.1	White	0.000580276	0.00191913	0.00158693	0.00103727	0.00113676	0.00103074	0.00154585	0.000574574	0.00133418	0.0014477	0.0032306	0.00940838	0.00273056	0.000354105	0.00149671	0.00228591	0.00136356	0.00141857	0.000472453	0.00068985	0.00198451	0.00105234	0.00107664	0.00131483	0.000569795
	Low R/FR	0.000884681	0.00203637	0.00167554	0.000430305	0.000749494	0.00288188	0.00220945	0.000365268	0.00263293	0.000146919	0.00076704	0.00145353	0.00465366	0.00185002	0.0021625	0.00109031	0.000806644	0.000831914	0.00202374	0.000545111	0.00074908	0.00141309	0.00102383	0.00173224	0.00291262
HvCaM.2	White	0.0104391	0.00365812	0.027246	0.0274683	0.102467	0.0233522	0.00547137	0.00855179	0.0200968	0.0485153	0.00722537	0.0294315	0.0172164	0.057877	0.00658673	0.0234741	0.0344977	0.0136715	0.0236648	0.0159199	0.0397937	0.0286824	0.029894	0.0284043	0.0435468
	Low R/FR	0.0404566	0.0159127	0.0280466	0.0278814	0.203045	0.0891364	0.102085	0.00183832	0.0596079	0.0512502	0.0998305	0.0299452	0.00918021	0.101921	0.135981	0.103988	0.0210369	0.0121483	0.0150878	0.0210378	0.0117179	0.0226048	0.0127695	0.0466035	0.0450512
HvCDPK12	White	0.0018055	0.0004241	0.000281206	0.000412499	0.000535958	0.00149097	0.00252485	0.000124819	0.000588892	0.00135339	0.00192607	0.00305509	0.00173871	0.00190166	0.000564553	0.000480447	0.00019149	0.000139879	0.000133462	8.52565e-05	0.000221001	0.000267997	0.000512103	0.000245111	0.00110245
	Low R/FR	0.00393448	0.000673852	0.000710826	0.00137808	0.00241866	0.0019167	0.00386739	0.000133109	0.0015577	0.000342379	0.00374696	0.000269183	0.000687825	0.00127882	0.00168281	0.000402394	0.000489765	0.000642111	0.00116875	0.000404694	0.000459611	0.00064362	0.00127974	0.000557919	0.000767976
HvCAMTA3 (pred.)	White	0.000123457	0.00010978	0.000298768	0.000251103	0.000111759	6.06721e-05	0.000101447	4.64792e-05	0.000370401	8.21603e-05	0.000220083	0.000692018	0.000212912	0.000261137	0.000140179	0.000755346	4.56251e-05	2.07735e-05	6.95488e-05	0.000242615	0.000357746	9.75166e-05	0.000421326	0.000115623	5.72675e-05
	Low R/FR	6.95379e-05	0.000142268	0.000234002	0.000206773	0.000800373	0.000267371	0.000375678	2.61222e-05	0.000385443	0.000410201	0.00191531	0.00075765	0.00135365	0.000513491	0.00109406	0.000681549	6.91129e-05	0.00024353	0.000255209	8.75229e-05	9.48255e-05	0.000168207	5.46139e-05	3.95307e-05	0.000234519
HvCBF2A	White	8.35941e-05	0.000150828	0.00120323	0.000369027	0.000524672	0.000105494	4.32758e-05	3.27393e-05	0.00135917	0.00198845	0.000989934	3.10296e-05	2.43908e-05	0.000985849	0.00106758	0.00261994	6.88715e-05	4.77659e-05	6.26241e-05	0.000388148	0.000578683	0.000425225	0.000167932	5.07431e-05	4.07484e-05
	Low R/FR	1.20561e-05	4.77339e-05	0.00154597	8.25422e-05	0.000554116	0.000162755	1.69829e-05	3.95786e-05	0.000650649	0.00238765	0.000442085	3.10779e-05	5.80255e-05	0.000490224	0.00746361	0.00279956	0.000132352	0.000163906	0.000223773	0.000397509	0.000370495	0.000294358	9.89858e-05	0.000280319	0.000488987
HvCBF3	White	1.2805e-05	8.98314e-08	1.57518e-05	9.38609e-06	9.83812e-06	3.83572e-06	2.38088e-06	4.81805e-06	6.87415e-06	1.25643e-06	5.32503e-06	5.43425e-05	2.4968e-05	1.91994e-06	1.00883e-05	1.03206e-05	1.42853e-05	1.78451e-06	3.17601e-06	2.80835e-06	2.13643e-05	1.05444e-05	9.25395e-06	7.09617e-06	1.55896e-06
	Low R/FR	5.74073e-06	6.52935e-06	1.38634e-06	1.09693e-07	2.34732e-06	1.73777e-06	7.38199e-06	1.05824e-06	3.03069e-06	1.517e-06	2.02081e-05	4.01066e-05	1.34759e-06	5.00987e-06	4.96893e-06	3.86506e-05	6.7285e-06	1.43355e-06	2.23418e-06	1.68703e-08	1.5313e-05	7.10045e-06	1.03666e-05	2.71878e-06	8.10991e-07
HvCBF4B	White	1.83893e-06	8.38604e-05	0.00121379	0.00058634	0.000394671	0.000139835	1.4479e-06	1.08719e-05	0.000475509	0.0053924	0.000189588	6.32562e-05	2.87685e-07	0.00033067	0.00102586	0.00305077	2.20509e-05	7.03043e-06	4.50499e-06	0.000154017	0.00112286	0.00288759	0.000141418	1.09994e-05	7.56437e-06
	Low R/FR	2.04424e-06	0.000162553	0.00470069	0.00117976	0.00183583	0.000321463	0	5.24969e-05	0.00882487	0.00215412	0.00120546	6.75532e-05	5.20373e-06	0.000242244	0.00965836	0.000299339	0.00022441	0.000304622	0.000227652	0.000551045	0.00144141	0.000509947	0.000350497	5.07152e-05	0.000270754
HvCBF6	White	0.000243399	8.48927e-05	2.80865e-05	0.000220445	5.94343e-05	9.47367e-05	6.67737e-05	9.12654e-06	7.02334e-05	0.000242413	0.000128528	0.000198225	9.79046e-05	5.08652e-05	2.40115e-05	0.000177345	1.51869e-05	4.61263e-05	3.43237e-05	9.73293e-05	7.29657e-05	5.93457e-05	0.000106251	4.93255e-05	2.83276e-05
	Low R/FR	9.23182e-05	2.65335e-05	2.73704e-05	0.00069717	7.91946e-05	6.44791e-05	4.56739e-05	7.18424e-06	7.34145e-05	0.000746577	4.6136e-05	7.336e-06	4.00892e-05	5.74619e-05	7.96679e-05	1.57403e-05	8.34785e-06	1.29003e-05	8.77478e-06	9.97612e-06	2.9688e-05	6.74693e-06	1.95997e-05	1.21976e-05	7.60682e-06
HvCBF9	White	7.70423e-05	7.45459e-05	0.000136434	3.75891e-05	0.000166341	2.63675e-05	4.04976e-05	3.45813e-06	9.74508e-05	0.000385094	0.000177086	0.00016512	0.00016237	8.76761e-05	5.147e-05	0.00105161	5.04341e-05	6.54135e-05	4.10864e-05	4.65538e-05	0.000922725	0.000171797	7.44157e-05	6.54447e-05	1.35568e-06
	Low R/FR	0.000343297	0.000325029	0.000852545	0.00020507	0.000529683	2.45115e-05	7.51371e-05	3.51001e-05	0.000974055	0.000666346	0.000141555	0.000195091	0.000735781	0.000274002	0.00217588	0.000243279	0.000307831	7.99569e-05	0.000367398	0.000128372	0.00018606	0.00019683	1.73159e-05	0.000103087	0.000418618
HvCBF14	White	2.43748e-08	0.000362439	0.00439469	0.000372641	1.17573e-05	n/a	n/a	8.98103e-06	0.000519948	7.21681e-05	n/a	2.50619e-05	1.04614e-06	0.000197495	0.000635899	0.00470145	2.9713e-06	6.30474e-06	4.91263e-05	0.00020139	0.00104935	0.000809114	6.15119e-06	4.26452e-05	0.000140355
	Low R/FR	n/a	0.000350021	0.000490928	0.000391631	2.76557e-07	n/a	n/a	0.000103441	0.000967811	0.000819351	n/a	n/a	0.000119273	0.000501438	0.00441264	0.000782212	4.83777e-05	0.000247398	0.000373743	6.69281e-05	0.000325622	6.99157e-05	0.000370913	0.000810618	0.000273048
